# Supplementary material
Source: PubMed Central journal article supplement (PMC2814499)
Supplement: tpc.109.070854_1.pdf [file tpc.109.070854_1.pdf]

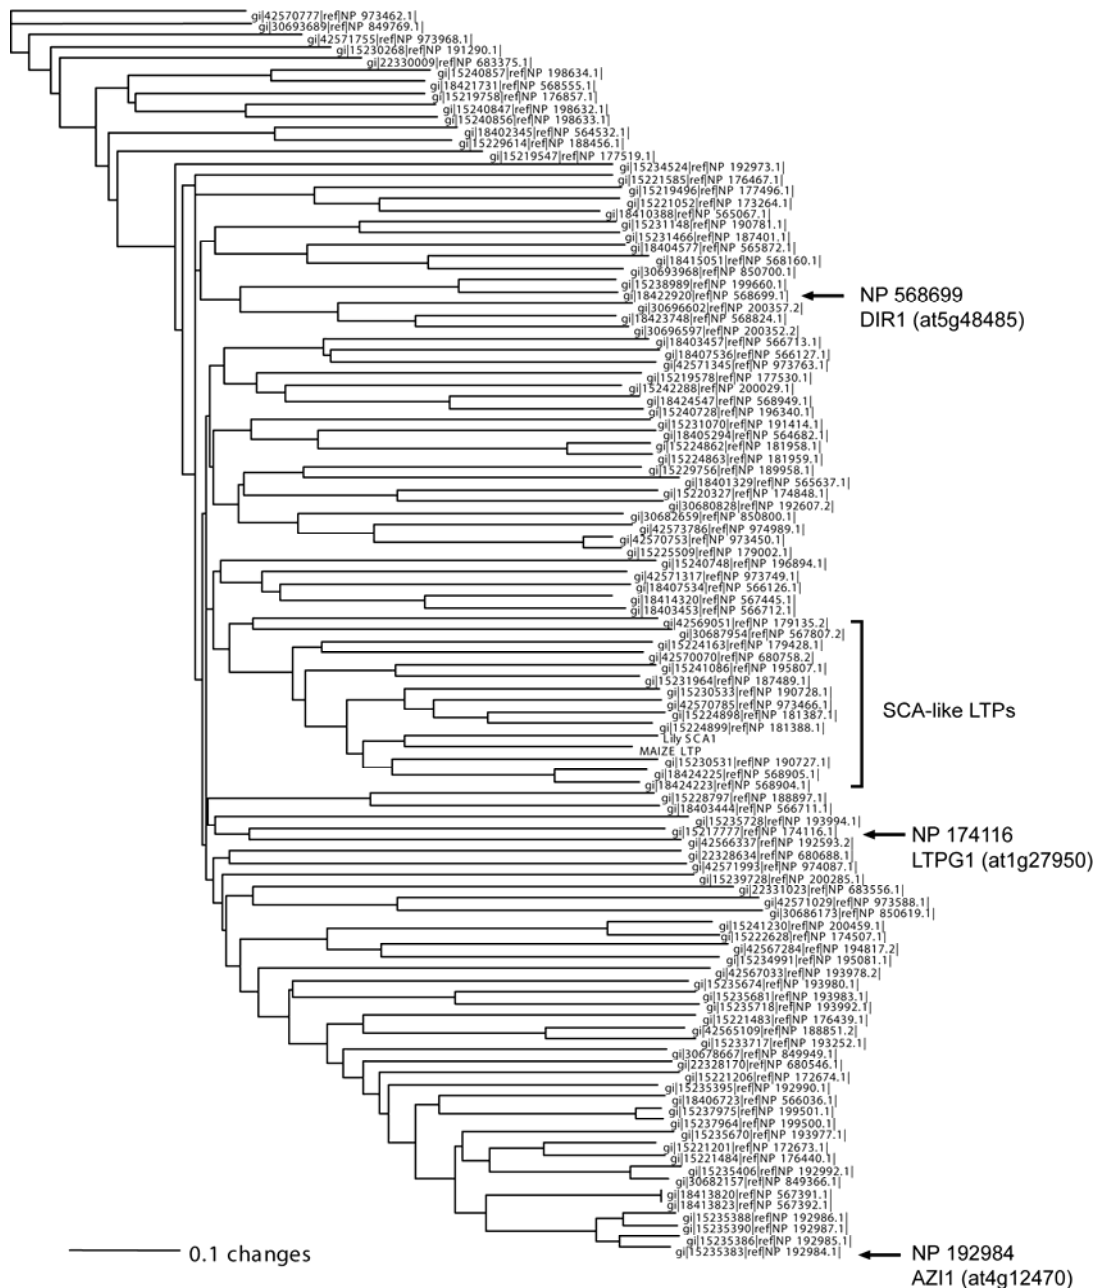

**Supplemental Figure 1.** A Genome-Wide Search for SCA-like *Arabidopsis* LTPs. *Arabidopsis* proteins, annotated as 'lipid transfer protein' or 'putative LTP', were obtained from the TAIR data bank (Altschul et al., 1990). An unrooted neighbor-joining tree of 107 *Arabidopsis* LTPs or putative LTPs, lily SCA1 (Q9SW93), and maize LTP (P19656) was generated to identify the SCA-like LTP cluster (Figure 1A). Arrows indicate the three other LTPs that were previously studied for their functions using a genetic approach: Defective in induced resistance 1 (DIR1) (Maldonado et al., 2002), azelaic acid induced 1 (AZI1) (Jung et al., 2009), and glycosylphosphatidylinositol-anchored LTP 1 (LTPG1) (DeBono et al., 2009).

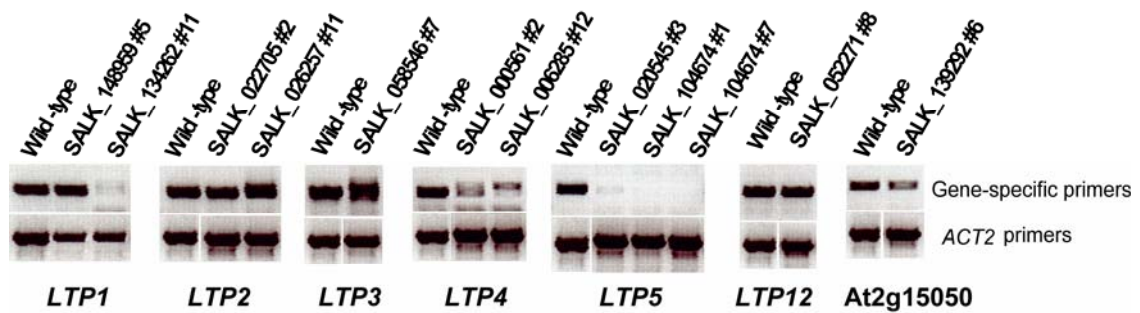

**Supplemental Figure 2.** Gene Expression Levels in T-DNA Insertion Lines of SCA-like *Arabidopsis* LTPs.

Homozygous T-DNA alleles for SCA-like LTPs, obtained by PCR-based genotyping (see Supplemental Table 1 online), were evaluated for gene expression by RT-PCR analysis (three replicates for alleles of LTP5 and two for others) using the gene-specific primer sets (see Supplemental Table 3 online). PCRs were performed in 35 cycles.

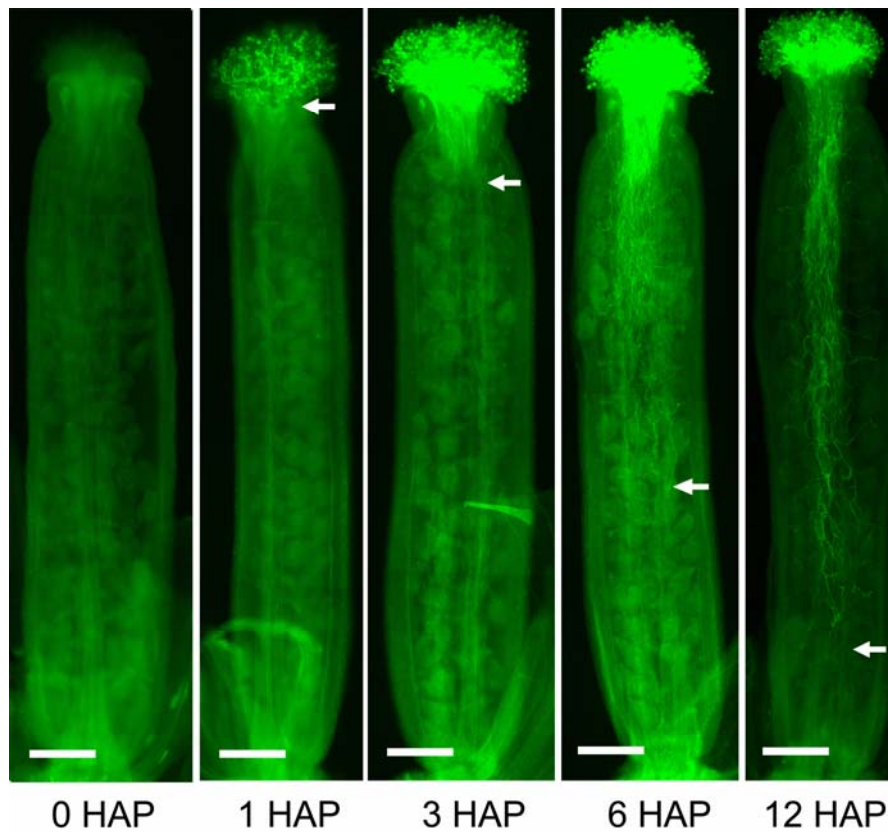

**Supplemental Figure 3.** *In Vivo Arabidopsis* Pollen Tube Growth. About five wild-type flowers at stage 12 (Smyth et al., 1990) per each time course (0 to 12 hours) were emasculated a day before hand pollination. Pollen tube growth was visualized by aniline blue staining. Arrows indicate the growing pollen tube front. HAP, hours after pollination. Bar = 200 $\mu$ m.

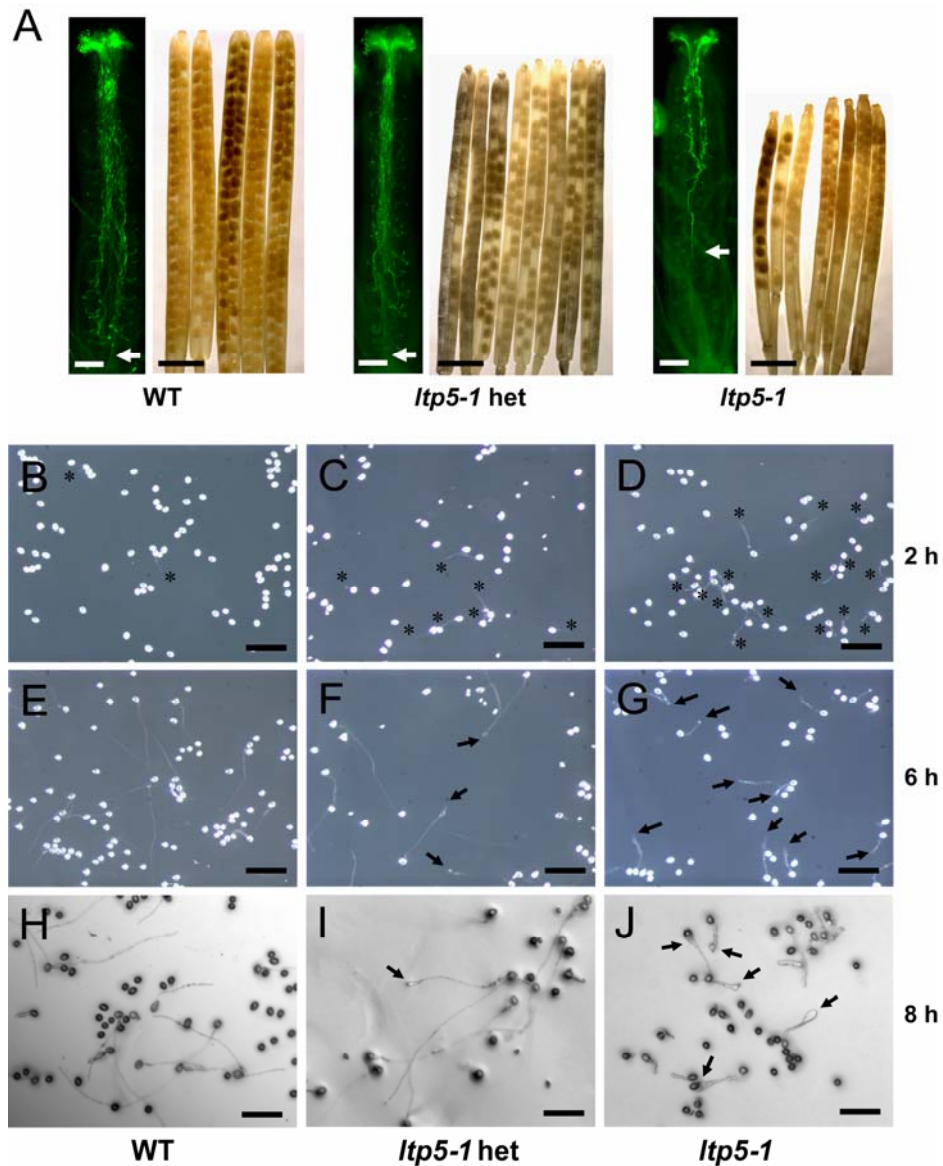

**Supplemental Figure 4.** Heterozygous *ltp5-1* Showed Disturbed Pistil Function in Seed Formation and Abnormal *In Vitro* Pollen Tube Morphology.

**(A)** *In vivo* pollen tube growth and siliques. Flowers at stage 14 (Smyth et al., 1990) were stained with aniline blue to visualize *in vivo* pollen tube growth. Arrows indicate the pollen tube front. Bar = 200 $\mu$ m. Mature siliques were decolorized with 100% EtOH to examine seed set. Bar = 2mm.

**(B to J)** *In vitro* pollen tube growth assay. Pollen tube growth and tip morphology were examined at 2 (**B to D**), 6 (**E to G**), and 8 (**H to J**) hours after germination, respectively. Stars indicate precociously germinating pollen tubes. Arrows indicate the abnormally swollen pollen tube tips of *ltp5-1* het (~16%,  $n = 80$ ) and *ltp5-1* (59%,  $n = 106$ ). Bar = 100 $\mu$ m.

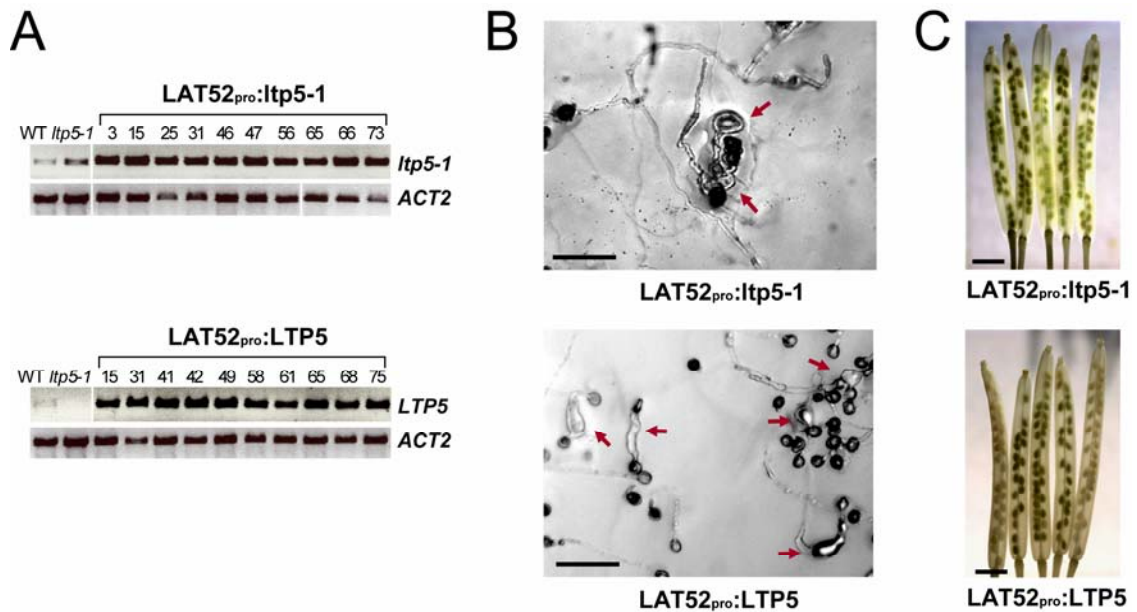

**Supplemental Figure 5.** Pollen-Targeted *ltp5-1* or *LTP5* Overexpression Lines at T1 Generation Resulted in Abnormal Pollen Tube Tip Morphology *In Vitro* and a Defect in Seed Formation.

**(A)** RT-PCR analysis in two replicates for the transgene expression in LAT52<sub>pro</sub>:*ltp5-1* or LAT52<sub>pro</sub>:*LTP5* plants. Total RNAs were purified from the inflorescence of ten randomly selected plants. The primer set, LTP5-5B and LTP5m-3K in Figure 1B, was used to amplify *ltp5-1* transcripts. The *LTP5* gene-specific primer set, LTP5-5 and LTP5-3 in Figure 1B, was used to amplify *LTP5* transcripts. Wild-type and *ltp5-1* plants were used as gene expression controls. PCRs were performed in 30 cycles. *ACT2* levels were examined as the PCR control.

**(B)** *In vitro* pollen tube growth assay of LAT52<sub>pro</sub>:*ltp5-1* or LAT52<sub>pro</sub>:*LTP5* plants. Both LAT52<sub>pro</sub>:*ltp5-1* and LAT52<sub>pro</sub>:*LTP5* pollen displayed severely swollen pollen tube tips in 8 hours (Arrows). Bar = 100 $\mu$ m.

**(C)** Siliques of both LAT52<sub>pro</sub>:*ltp5-1* and LAT52<sub>pro</sub>:*LTP5* plants were small in size and were shown to harbor small numbers of seeds. Bar = 2mm.

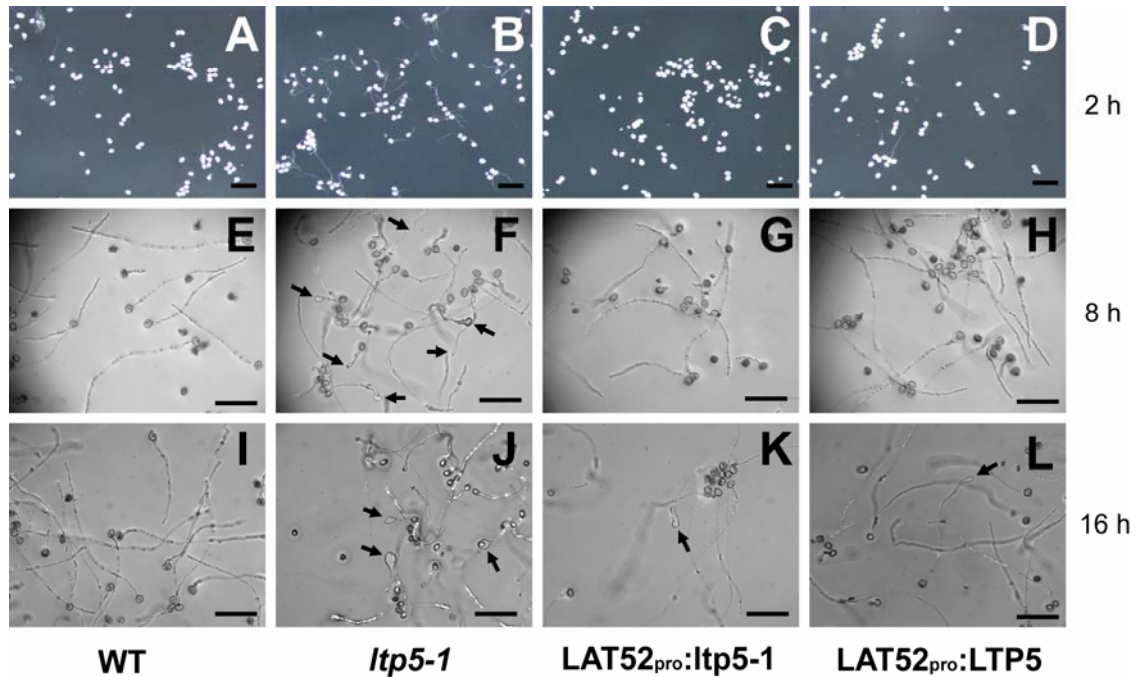

**Supplemental Figure 6.** *In Vitro* Pollen Tube Growth of LAT52<sub>pro</sub>:ltp5-1 or LAT52<sub>pro</sub>:LTP5 at T3 Generation.

Pollen of transgenic plants, which contain the transgene in a homozygous and single copy, were germinated on solid medium for 2 (A to D), 8 (E to H), and 16 hours (I to L), respectively. Neither LAT52<sub>pro</sub>:ltp5-1 (C) nor LAT52<sub>pro</sub>:LTP5 (D) showed precocious pollen germination at 2 hours, unlike *ltp5-1* (B). In addition, they did not show abnormal tube tip morphology until 16 hours of the germination (K and L). Arrows indicate the abnormally swollen pollen tube tips. Bar = 100µm.



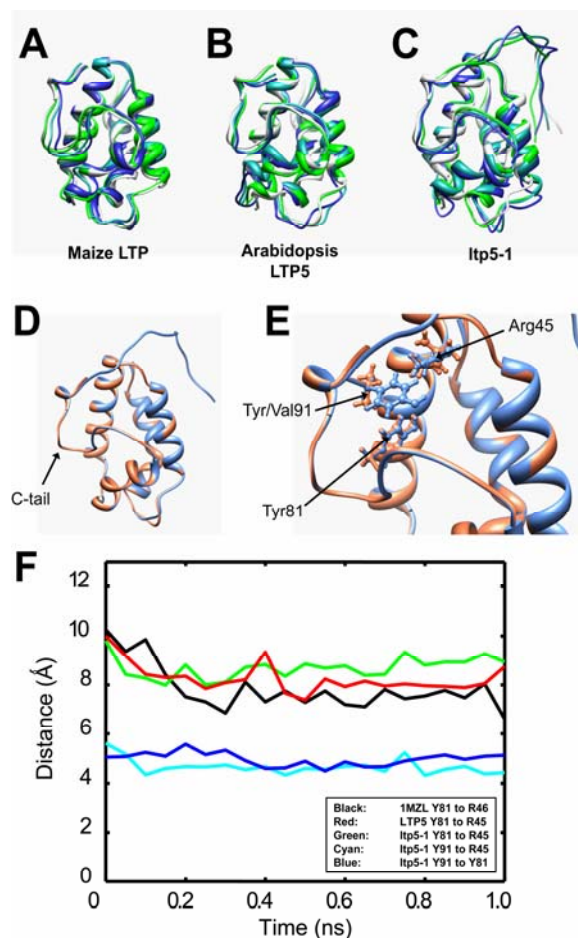

**Supplemental Figure 7.** Comparison of Molecular Dynamics (MD) Snapshots for Maize LTP, *Arabidopsis* LTP5 and *ltp5-1*.

**(A to C)** Superposition of ribbon representations of the initial structures (0 ns – no MD) and three MD snapshots (50 ps, 500 ps, and 1 ns) for **(A)** maize LTP, **(B)** *Arabidopsis* LTP5, and **(C)** *ltp5-1*. The coloring scheme is as follows: white for 0 ns, green for 50 ps, blue-green for 500 ps, and blue for 1 ns.

**(D and E)** Comparison of LTP5 and *ltp5-1* structures without MD simulation. **(D)** Superposition of backbone ribbon representations of LTP5 and *ltp5-1*. **(E)** Tyr91 in *ltp5-1*, replacing Val91 in LTP5, is inserted in between the two conserved residues, Tyr 81 and Arg 45. The coloring scheme is as follows: Pink for LTP5 and cyan for *ltp5-1*.

**(F)** Side chain distances during the 1 ns MD simulation of *ltp5-1* between residues Tyr81 and Arg45 with residue Tyr91 in *ltp5-1*, replacing Val91 of LTP5. For comparison, side chain distances for the Tyr81-Arg45 (Arg46 in maize numbering) pairs of LTP5, *ltp5-1* and maize LTP are also shown from their respective 1 ns MD trajectories. Distances in the 4 – 6 Å range indicate the presence of  $\pi$ -cation interaction for the pair Tyr91-Arg45 and  $\pi$ -stacking interaction for the pair Tyr91-Tyr81. The remaining distances, involving Tyr81-Arg45/46, are outside possible interaction range, although there is a tendency for maize Tyr81 and Arg46 to get closer towards the end of the MD trajectory. The coloring scheme is black for maize LTP Tyr81-Arg46, red for LTP5 Tyr81-Arg45, green for *ltp5-1* Tyr81-Arg45, cyan for *ltp5-1* Tyr91-Arg45, and blue for *ltp5-1* Tyr91-Tyr81. All distances were measured using the CZ atom for arginine and the centroid, or geometric center, of the six carbons of the benzene ring for tyrosine.

**Supplemental Table 1.** PCR-based Genotyping Analysis for SALK T-DNA Insertion Alleles of SCA-like *Arabidopsis* LTPs.

| LTPs (Gene locus) | SALK Number: T-DNA insertion     | Genotype (I.D.#)        |
|-------------------|----------------------------------|-------------------------|
| LTP1 (At2g38540)  | SALK_148959: 1kb-Promotor        | -/- (5,10,11)           |
| LTP1 (At2g38540)  | SALK_134262: 1kb-Promotor        | -/- (8,11); -/+ (2,6,7) |
| LTP2 (At2g38530)  | SALK_022705: 3'-UTR <sup>¶</sup> | -/- (1,2,3,4,5,8,10)    |
| LTP2 (At2g38530)  | SALK_026257: 1kb-Promotor        | -/- (11)                |
| LTP3 (At5g59320)  | SALK_058546: 1kb-Promotor        | -/- (7); -/+ (5)        |
| LTP4 (At5g59310)  | SALK_000561: 1kb-Promotor        | -/- (1,2,6,7)           |
| LTP4 (At5g59310)  | SALK_006285: 1kb-Promotor        | -/- (4, 12)             |
| LTP5 (At3g51600)  | SALK_020545: Intron              | -/- (3, 7)              |
| LTP5 (At3g51600)  | SALK_104674: Intron              | -/- (1, 7)              |
| LTP (At2g15050)   | SALK_139292: 5'-UTR <sup>¶</sup> | -/- (6)                 |
| LTP12 (At3g51590) | SALK_052271: Intron              | -/- (8, 12); -/+ (4)    |

#, Identification number of a specific plant used in the experiment.

¶, Untranslated region



## Supplemental Table 2. PCR primer sequences

| PCR products                                                                                                        | Forward primers                                                     | Reverse primers                                                       |
|---------------------------------------------------------------------------------------------------------------------|---------------------------------------------------------------------|-----------------------------------------------------------------------|
| <b>PCR-based genotyping for T-DNA insertion alleles of <i>LTP5</i></b>                                              |                                                                     |                                                                       |
| 1.5-kb for <i>LTP5</i>                                                                                              | 674-5: TTGTACCAGCGAGGCCAGACAC                                       | 674-3: ACTGCATGTAGGGTCGATCGAC                                         |
| 1-kb for <i>T-DNA</i>                                                                                               | LBa1: TGGTTCACGTAGTGGGCCATCG                                        |                                                                       |
| <b>RT-PCR analysis for <i>SCA</i>-like <i>Arabidopsis</i> <i>LTPs</i> (Gene-specific primers)</b>                   |                                                                     |                                                                       |
| <i>LTP1</i>                                                                                                         | TAAGAGATCAATATGGCTGG                                                | ATCATCTCACCGTTGCTAG                                                   |
| <i>LTP2</i>                                                                                                         |                                                                     | AGTAGCTTCATTTGACCGTC                                                  |
| <i>LTP3</i>                                                                                                         | CAAACACAATGGCTTTTCG                                                 | AACGACGACGTAAGCTTC                                                    |
| <i>LTP4</i>                                                                                                         |                                                                     | GATGTCGTTATTCCCCAC                                                    |
| <i>LTP5</i>                                                                                                         | AAGATATGGAGGGACTCTTG                                                | TTGATCACCTGACGGTGTTAC                                                 |
| <i>LTP6</i>                                                                                                         | AAAGTAACATGAGATCTCTC                                                | ATTTCTGCTTGTCTCACTG                                                   |
| <i>LTP12</i>                                                                                                        | AATGGCGTTTACTCCGAAG                                                 | TCACTAGCCTCTTTCACAC                                                   |
| <i>LTP (At2g15050)</i>                                                                                              | CATTACTGGAAGTAAAGG                                                  | TTAACATATGTACGGTGTTC                                                  |
| <b>RT-PCR analysis for the aberrant <i>LTP5</i> in <i>ltp5-1</i> plants</b>                                         |                                                                     |                                                                       |
| Aberrant <i>LTP5</i>                                                                                                | LTP5-5B:<br>GGATCCATGGAGGGACTCTGAAG                                 | LTP5m-3K:<br>GGTACCTTAGGACCTCAAGTAAAAATG                              |
| <i>LTP5</i> 1 <sup>st</sup> exon                                                                                    |                                                                     | LTP5C: GTTACAGTTGGTTCTGGC                                             |
| <b>PCR for plasmid constructs: LAT52<sub>pro</sub>:LTP5, LAT52<sub>pro</sub>:ltp5-1, and LTP5<sub>pro</sub>:GUS</b> |                                                                     |                                                                       |
| <i>LAT52</i> promoter                                                                                               | PLAT52-5R:<br>GAATTCTATACCCCTTGGATAAAGG                             | PLAT52-3B:<br>GGATCCTTTAAATTGGAATTTTTTTTTT<br>TCC                     |
| <i>LTP5</i>                                                                                                         | LTP5-5B:<br>GGATTCATGGAGGGACTCTGAAG                                 | LTP5-3Xb:<br>TCTAGATCACCTGACGGTGTTACAG                                |
| <i>ltp5-1</i>                                                                                                       |                                                                     | LTP5m-3Xb:<br>TCTAGATTAGGACCTCAAGTAAAAATG                             |
| 2-kb-upstream region<br>of <i>LTP5</i>                                                                              | PLTP5-5:<br>GGGGACAAGTTTGTACAAAAAAGCAG<br>GCTYYGTTTGTACATTATTCATATG | PLTP5-3:<br>GGGGACCACCTTTGTACAAGAAAGCTG<br>GGTNATCTTAATTTTTTTTTTTTCTC |

**Supplemental Table 3.** Transgenic Plants with Pollen-Specific Overexpression of *LTP5* or *Itp5-1* Gene in T1 Generation.

| Phenotypes examined                     | No. of plants (%)          |                              |
|-----------------------------------------|----------------------------|------------------------------|
|                                         | LAT52 <sub>pro</sub> :LTP5 | LAT52 <sub>pro</sub> :Itp5-1 |
| <i>In vitro</i> pollen growth assays    | 72                         | 57                           |
| Abnormal pollen tube morphology         | 53 (73.6%)                 | 49 (86%)                     |
| Examination of siliques                 | 71                         | 50                           |
| Small sized siliques (less than 1.3 cm) | 20 (28.2%)                 | 22 (44%)                     |
| Unfertilized eggs found in the silique  | 33 (46.5%)                 | 34 (68%)                     |

## SUPPLEMENTAL DATA REFERENCES

- Altschul, S.F., Gish, W., Miller, W., Myers, E.W., and Lipman, D.J.** (1990). Basic local alignment search tool. *J. Mol. Biol.* **215**, 403-410.
- DeBono, A., Yeats, T.H., Rose, J.K.C., Bird, D., Jetter, R., Kunst, L., and Samuelsen, L.** (2009). Arabidopsis LTPG is a glycosylphosphatidylinositol-anchored lipid transfer protein required for export of lipids to the plant surface. *Plant Cell* **21**, 1230-1238.
- Jung, H.W., Tschaplinski, T.J., Wang, L., Glazebrook, J., and Greenberg, J.T.** (2009). Priming in systemic plant immunity. *Science* **324**, 89-91.
- Maldonado, A.M., Doerner, P., Dixon, R.A., Lamb, C.J., and Cameron, R.K.** (2002). A putative lipid transfer protein involved in systemic resistance signaling in Arabidopsis. *Nature* **419**, 399-403.
- Smyth, D.R., Bowman, J.L., and Meyerowitz, E.M.** (1990). Early flower development in Arabidopsis. *Plant Cell* **2**, 755-767.
